# Supplementary material for: Differential regulation of H3S10 phosphorylation, mitosis progression and cell fate by Aurora Kinase B and C in mouse preimplantation embryos
Source: PubMed Central journal article supplement (PMC5563281; doi:10.1007/s13238-017-0407-5), 2017-04-22
Supplement: 13238_2017_407_MOESM12_ESM.pdf [file 13238_2017_407_MOESM12_ESM.pdf]

1 Supplementary Figure Legends

Figure S1

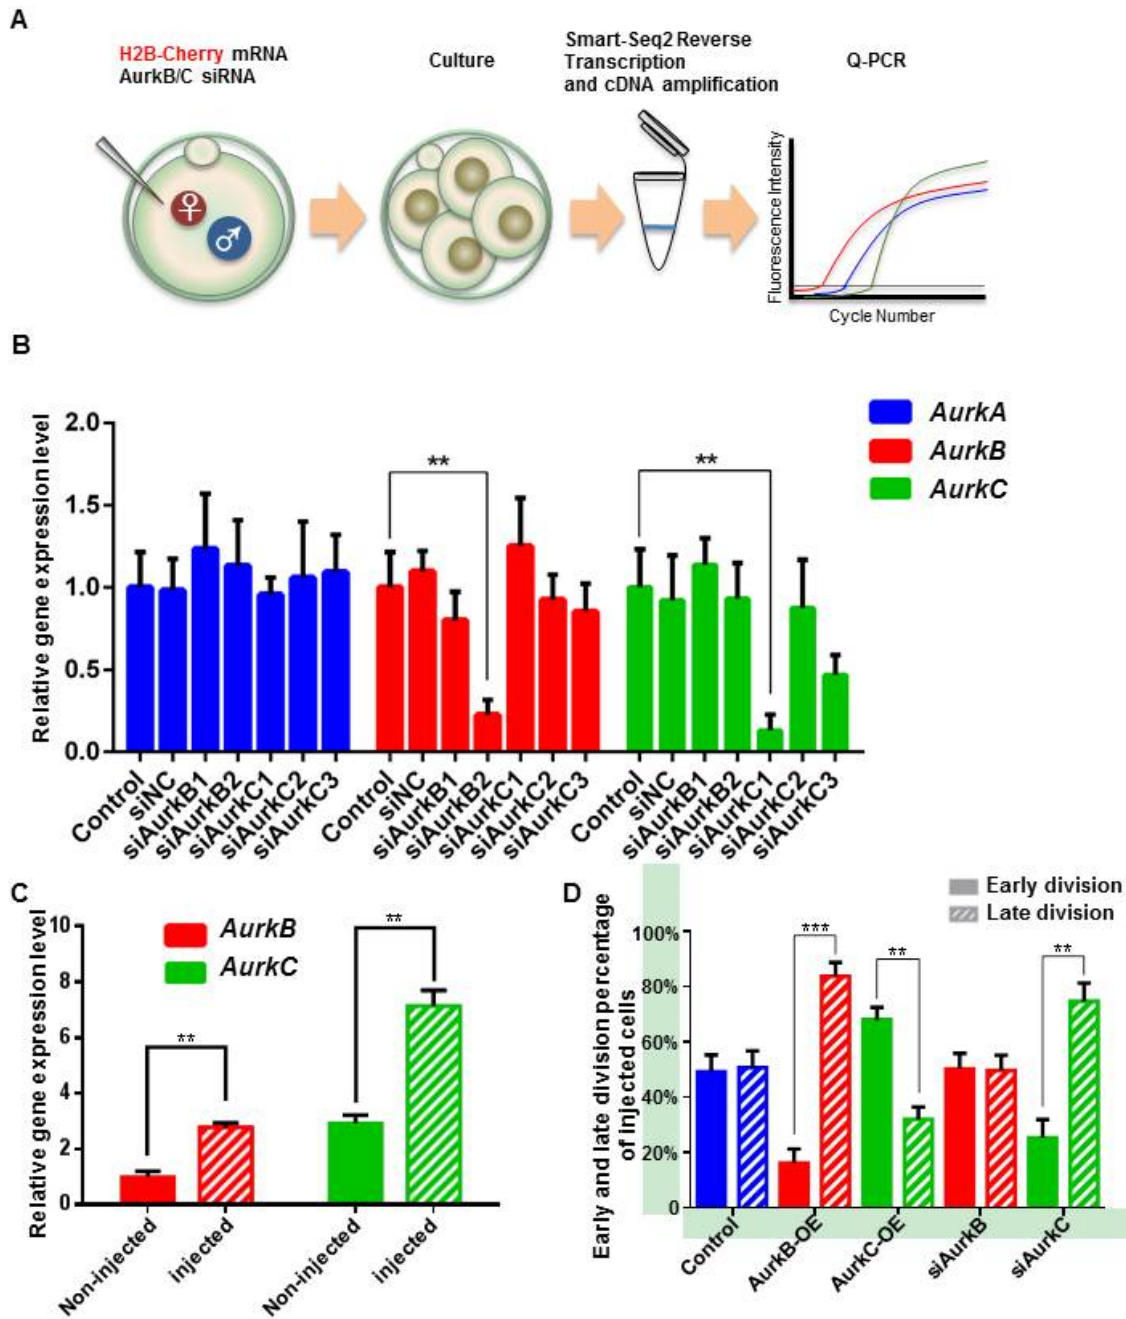

3 **Figure S1. AurkB and AurkC siRNA knock-down efficiency confirmation in preimplantation**  
4 **embryos.**

5 (A) Schematic view of AurkB and AurkC siRNA microinjection and Q-PCR confirmation of  
6 knocking-down efficiency in preimplantation mouse embryos.

7 (B) Relative genes expression analysis. SiRNAs (Control, siNC, siAurkB1, siAurkB2, siAurkC1,  
8 siAurkC2, siAurkC3) were injected at 1-cell sate, early morula stage (8-cell stage) embryos  
9 were collected, lysed and subjected to RT-QPCR analysis. The level of AurkA, B and C in the  
10 siControl injected embryos was considered “1”, the bar and whiskers indicate means and SEM,  
11  $**p < 0.01$ .

12 (C) Q-PCR analysis of AurkB and AurkC expression level before and after mRNA injection.  
13 mRNAs were injected at zygote stage, at early 4-cell stage, embryos were collected, lysed and  
14 subjected to RT-QPCR analysis. The level of AurkB in wild type embryos was considered “1”,  
15 the bar and whiskers indicate means and SEM,  $**p < 0.01$ .

16 (D) Early and late division percentage of injected cells in the experiment of Figure 1E-H were  
17 counted, the bar and whiskers indicate means and SD,  $**p < 0.01$ ,  $***p < 0.001$ .

Figure S2

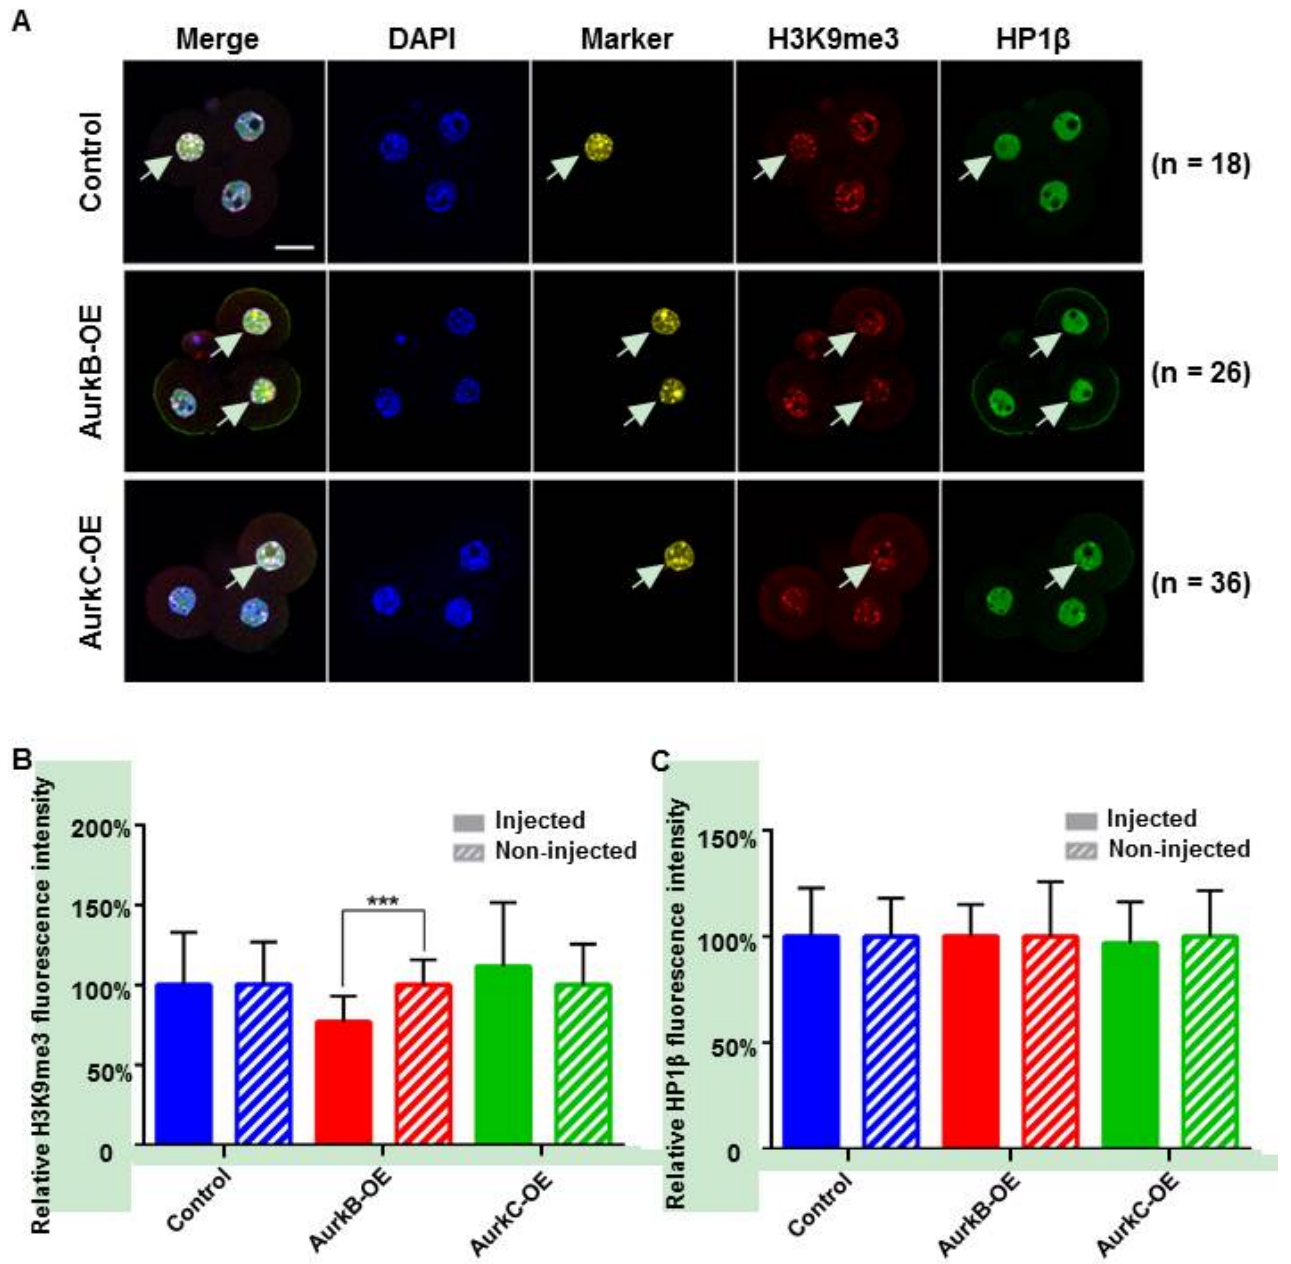

19 **Figure S2. Immunostaining of H3K9me3 and HP1 $\beta$  with AurkB and AurkC overexpression**  
20 **during 4-cell stage.**

21 (A) H3K4me3 and H3S10P immunostaining of morula stage embryos in Control (n = 18),  
22 AurkB-OE (n = 26), AurkC-OE (n = 36) groups. DNA (blue), H2B-GFP (Marker, yellow),  
23 H3K9me3 (red), HP1 $\beta$  (green). Scale bars, 20  $\mu$ m.

24 (B) Bar graph quantification of relative fluorescence intensity of H3K9me3 in injected and  
25 non-injected cells of Control (n = 18), AurkB-OE (n = 26), AurkC-OE (n = 36) groups. The bar  
26 and whiskers indicate means and SD, \*\*\* $p < 0.001$ .

27 (C) Bar graph quantification of relative fluorescence intensity of HP1 $\beta$  in injected and non-injected  
28 cells of Control (n = 18), AurkB-OE (n = 26), AurkC-OE (n = 36) groups. The bar and whiskers  
29 indicate means and SD.

Figure S3

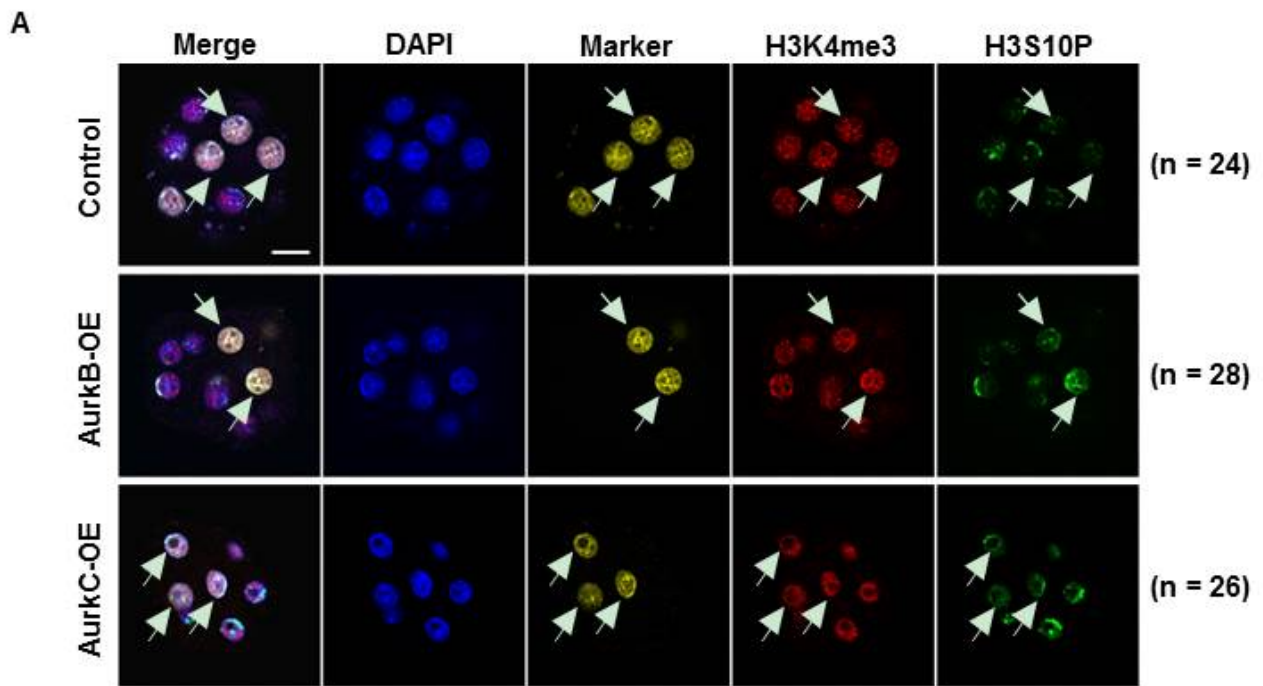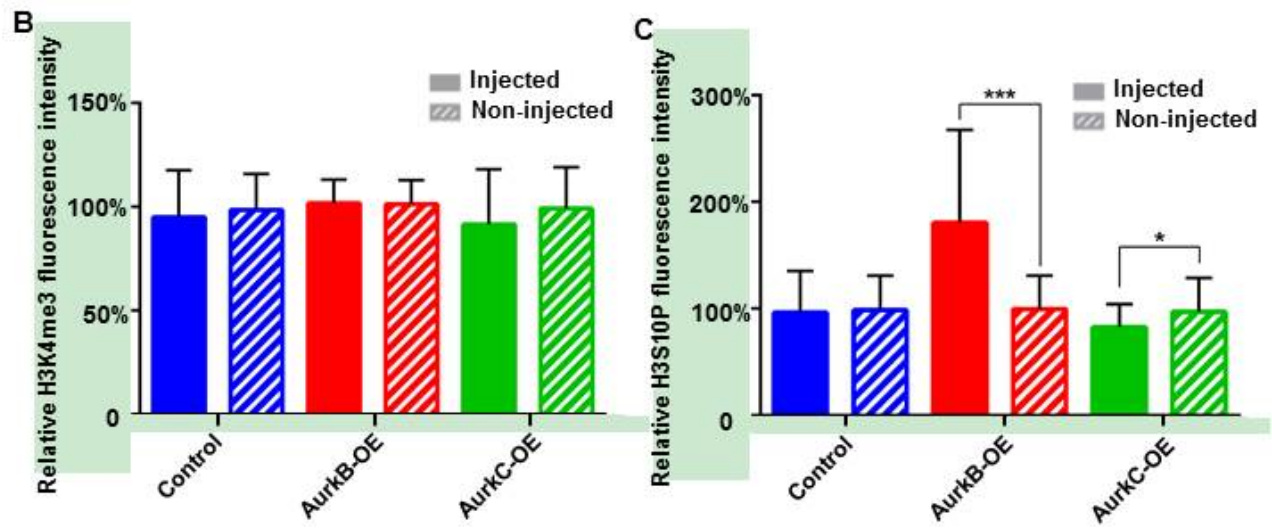

31 **Figure S3. Immunostaining of H3K3me3 and H3S10P with AurkB and AurkC overexpression**  
32 **during morula stage.**

33 (A) H3K4me3 and H3S10P immunostaining of morula stage embryos in Control (n = 24),  
34 AurkB-OE (n = 28), AurkC-OE (n = 26) groups. DNA (blue), H2B-GFP (Marker, yellow),  
35 H3K4me3 (red), H3S10P (green). Scale bars, 20  $\mu\text{m}$ .

36 (B) Bar graph quantification of relative fluorescence intensity of H3K4me3 in injected and  
37 non-injected cells of Control (n=24), AurkB-OE (n = 28), AurkC-OE (n = 26) groups. The bar  
38 and whiskers indicate means and SD.

39 (C) Bar graph quantification of relative fluorescence intensity of H3S10P in injected and  
40 non-injected cells of Control (n=24), AurkB-OE (n = 28), AurkC-OE (n = 26) groups. The bar  
41 and whiskers indicate means and SD, \* $p < 0.05$ , \*\*\* $p < 0.001$ .

Figure S4

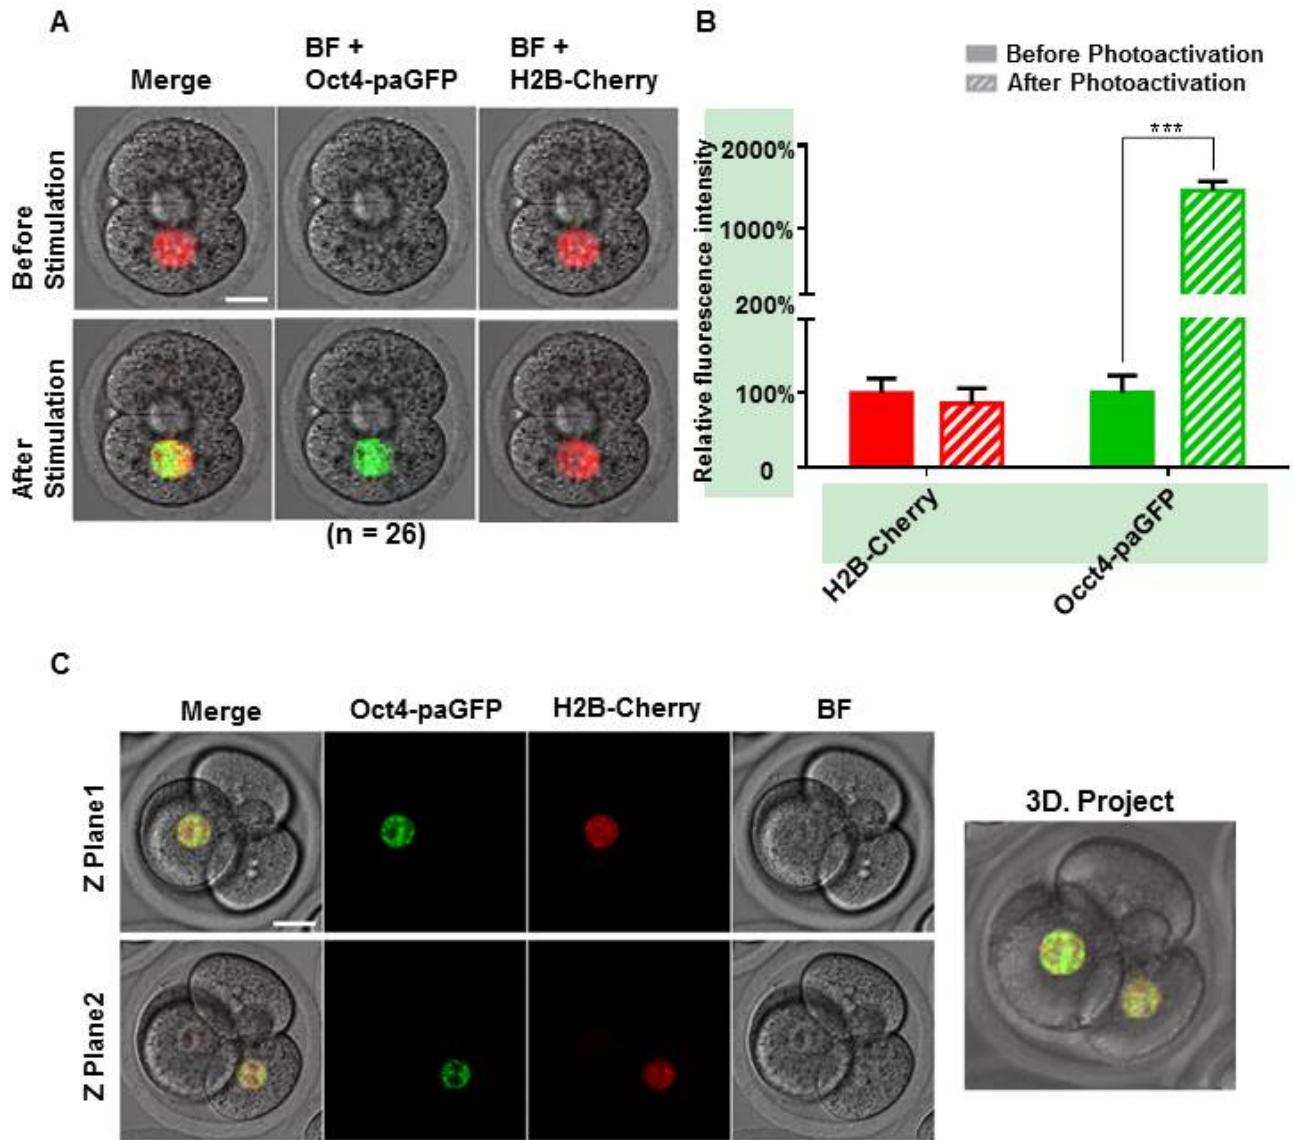

43 **Figure S4. Images of Oct4-paGFP fluorescence decay after photoactivation (FDAP) assay.**

44 (A) A 2-cell stage embryo with Oct4-paGFP and H2B-mCherry expression before and after  
45 photoactivation, H2B-Cherry (Marker, red), Oct4-paGFP (green), 3D projections (max. proj.)  
46 of merged images are shown in the right panels. Scale bars, 20  $\mu\text{m}$ .

47 (B) Relative fluorescence intensity of Oct4-paGFP and H2B-mCherry before and after  
48 photoactivation, the bar and whiskers indicate means and SD,  $***p < 0.001$ .

49 (C) The same 4-cell stage embryo with Oct4-paGFP and H2B-mCherry expression in different  
50 focus planes. Scale bar, 20  $\mu\text{m}$ .
