# Supplementary material for: Differential regulation of H3S10 phosphorylation, mitosis progression and cell fate by Aurora Kinase B and C in mouse preimplantation embryos
Source: PubMed Central journal article supplement (PMC5563281; doi:10.1007/s13238-017-0407-5), 2017-04-22
Supplement: 13238_2017_407_MOESM13_ESM.pdf [file 13238_2017_407_MOESM13_ESM.pdf]

**Supplementary Table 1. Primers for Q-PCR**

| Gene   | Accession      | Forward                       | Reverse                       | Tm. |
|--------|----------------|-------------------------------|-------------------------------|-----|
| Actb   | NM_007393.5    | GTGTGACGTTGACATCC<br>GTAAAGAC | TTGCTGATCCACATCTGCT<br>GGAAGG | 60  |
| AurkA  | NM_001291185.1 | CGGGTCCTGTGTCCTTC<br>TAA      | GTCTTCGGTCTTCTGCAAG<br>G      | 60  |
| AurkB  | NM_011496.2    | CCTGAAACATCCCAAC<br>ATCC      | CTCCCTGCAGACCTAACAG<br>C      | 60  |
| AurkC  | NM_020572.2    | TGGTTGATCTGTGGTGC<br>ATT      | CACAGAGCCTGGAGACCTT<br>C      | 60  |
| Oct4   | NM_001252452.1 | GGCTTCAGACTTCGCCT<br>CC       | AACCTGAGGTCCACAGTAT<br>GC     | 60  |
| Nanog  | NM_001289828.1 | ATGAAGTGCAAGCGGT<br>GGCAGAAA  | CCTGGTGGAGTCACAGAGT<br>AGTTC  | 60  |
| Klf4   | NM_010637.3    | ACAGGCGAGAAACCTT<br>ACCACTGT  | GCCTCTTCATGTGTAAGGC<br>AAGGT  | 60  |
| Nr5a2  | NM_001159769.2 | TCTCACACACAGAAGTC<br>GCGTTCA  | TGCAGGTTCTCCAGGTTCT<br>TCACA  | 60  |
| Prdm14 | NM_001081209.2 | CTCTTGATGCTTTTCGG<br>ATGACT   | GTGACAATTTGTACCAGGG<br>CA     | 60  |
