# Supplementary material for: Differential regulation of H3S10 phosphorylation, mitosis progression and cell fate by Aurora Kinase B and C in mouse preimplantation embryos
Source: PubMed Central journal article supplement (PMC5563281; doi:10.1007/s13238-017-0407-5), 2017-04-22
Supplement: 13238_2017_407_MOESM14_ESM.pdf [file 13238_2017_407_MOESM14_ESM.pdf]

1 **Supplementary Movie Legends**

2

3 **Movie S1. Time lapse movies of Securin-mCherry degradation during 2 to 4-cell division in**  
4 **mouse preimplantation embryos. Chromosomes of injected blastomeres were labelled with**  
5 **H2B-GFP.**

6 S1A: Representative control embryo.

7 S1B: Representative AurkB-OE embryo.

8 S1C: Representative AurkC-OE embryo.

9 S1D: Representative siAurkB embryo.

10 S1E: Representative siAurkC embryo.

11

12 **Movie S2. Time lapse movie of AurkC-KD induced cytokinesis failure during 2 to 4-cell**  
13 **division in mouse preimplantation embryos. Chromosomes of injected blastomeres were**  
14 **labelled with H2B-GFP.**

15

16 **Movie S3. Time lapse confocal movies of Oct4-paGFP degradation in 4-cell mouse**  
17 **preimplantation embryos. Nucleus of injected blastomeres were labelled with H2B-mCherry.**

18

19 S3A: Representative control embryo.

20 S3B: Representative AurkB-OE embryo.

21 S3C: Representative AurkC-OE embryo.

22 S3D: Representative siAurkB embryo.

23 S3E: Representative siAurkC embryo.
