# Supplementary material for: Differential regulation of H3S10 phosphorylation, mitosis progression and cell fate by Aurora Kinase B and C in mouse preimplantation embryos
Source: PubMed Central journal article supplement (PMC5563281; doi:10.1007/s13238-017-0407-5), 2017-04-22
Supplement: 13238_2017_407_MOESM15_ESM.pdf [file 13238_2017_407_MOESM15_ESM.pdf]

**Supplementary Table 2. Sequence of AurkB and AurkC siRNA.**

| Gene  | Accession   | siRNA    | Forward                                                        | Reverse                   |
|-------|-------------|----------|----------------------------------------------------------------|---------------------------|
| AurkB | NM_011496.2 | siAurkB1 | AGAAGUUGGCUGAGAA<br>CAA                                        | UUGUUCUCAGCCAACU<br>UCU   |
|       |             | siAurkB2 | CCAAGCUGCUCAAACA<br>UAATT                                      | AAUUAUGUUUGAGCAG<br>CUUGG |
| AurkC | NM_020572.2 | siAurkC1 | GGGUGCUUCCUUGCUA<br>GUU                                        | AACUAGCAAGGAAGCA<br>CCC   |
|       |             | siAurkC2 | CCAGGAAGCAUUUCAC<br>CAUTT                                      | AAAUGGUGAAAUGCUU<br>CCUGG |
|       |             | siAurkC3 | GGACAUCAAGCCAGAG<br>AAU                                        | AUUCUCUGGCUUGAUG<br>UCC   |
|       |             | siNC     | MISSION® siRNA Universal Negative Control #2, SIC002,<br>SIGMA |                           |
